# Supplementary material
Source: Springer Nature journal article supplement (https://www.springermedizin.de/resource/supplementary/12936_2008_697_MOESM2_ESM.pdf/9548024)

## Culture 1

Plate A

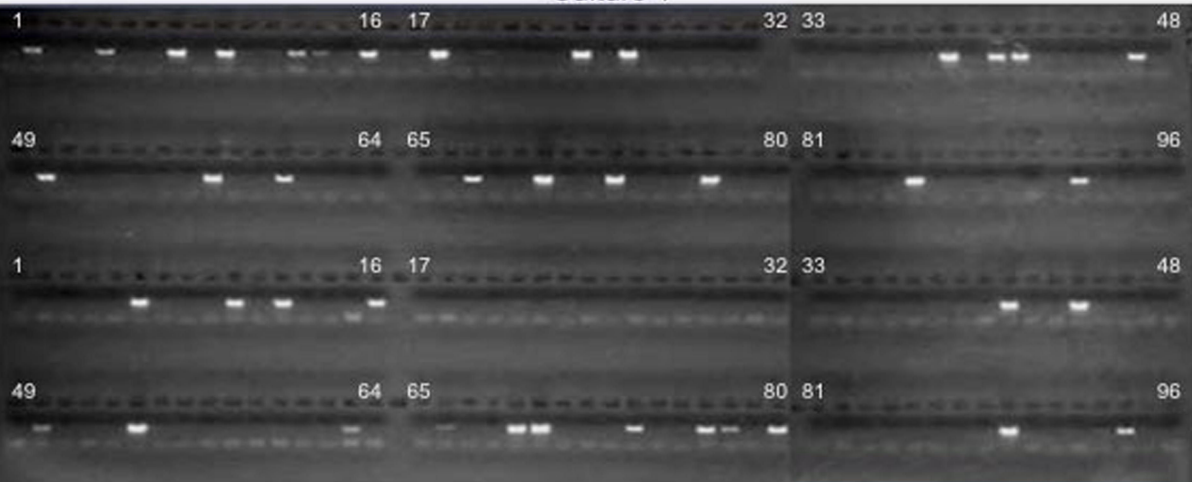

Plate B

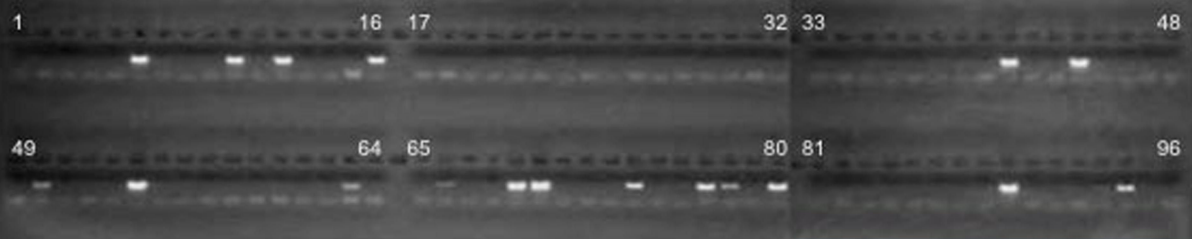

## Culture 2

Plate C

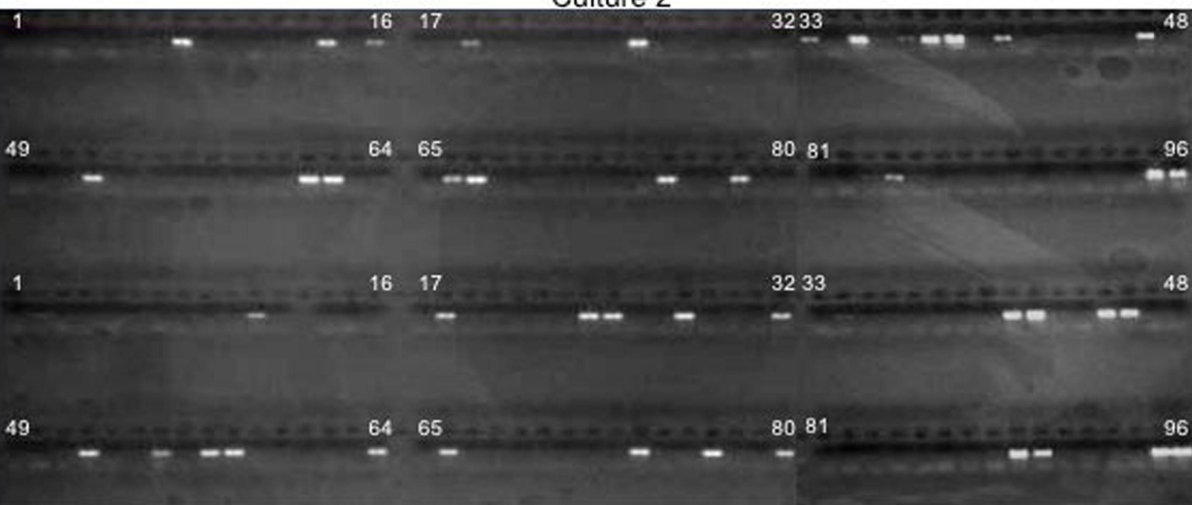

Plate D

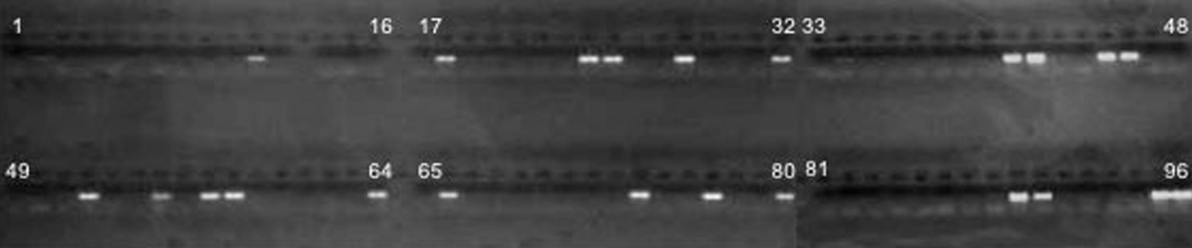

Supplement: MOESM2 [file 9548024]
